# Supplementary material
Source: publisher figshare collection journal article supplement (https://acs.figshare.com/ndownloader/files/12147389)
Supplement: Supplementary file 1 [file 12147389]

## Supporting Information

### Traceless Immobilization of Analytes for High-Throughput Experiments with SAMDI Mass Spectrometry

Kazi Y. Helal<sup>†</sup>, Azmain Alamgir<sup>†</sup>, Eric J. Berns<sup>‡</sup>, Milan Mrksich<sup>\*‡§||</sup>

<sup>†</sup>Departments of Chemical and Biological Engineering, <sup>‡</sup>Biomedical Engineering and <sup>§</sup>Chemistry, Northwestern University, Evanston, Illinois 60208, United States

<sup>||</sup>Department of Cell and Molecular Biology, Northwestern University Feinberg School of Medicine, Chicago, Illinois 60611, United States

Corresponding Author:

\* milan.mrksich@northwestern.edu

**Table of Contents:**

Materials & Methods (p S3 to S4)

Figure S.1. Comparison of photoimmobilization groups (p S5)

Figure S.2. Calibration curve for tolbutamide and hydroxy-tolbutamide (p S6)

Figure S.3.  $^1\text{H}$ -NMR spectrum of photoaffinity linker (p S7)

Figure S.4.  $^{13}\text{C}$ -NMR spectrum of photoaffinity linker (p S8)

## Materials & Methods

**Reagents.** All reagents were obtained from Sigma-Aldrich, unless otherwise noted. Disulfides used to form self-assembled monolayers were purchased from ProChimia Surfaces (Sopot, Poland) or Chemtos (Round Rock, TX). The P450 CYP2C9\*1 enzyme was purchased from Corning, (Tewksbury, MA). Deionized (DI) water was prepared by a Millipore filtration unit and used for all experiments.

**Solid Phase Peptide Synthesis of Photoaffinity linkers.** Peptide synthesis was performed according to standard protocols. MBHA-FMOC-Rink Amide Resin was placed in a column with filters plugged. The FMOC was deprotected with 20% piperidine in dimethylformamide (DMF) for 20 min; the solvent was filtered with a vacuum manifold. The resin was then washed 5 times with DMF. A solution contained 4:4:8 parts of amino acid, benzotriazol-1-yl-oxytripyrrolidinophosphonium hexafluorophosphate (PyBOP), and N-methyl morpholine was prepared and applied to the resin for 30 min. The solutions were then filtered; the resin was washed five times with DMF, and then the process was repeated. After the last step of the coupling, a cleavage cocktail was applied to the resin containing 95% trifluoroacetic acid (TFA), 2.5% H<sub>2</sub>O, and 2.5% triethylsilane (TES), and the resin was incubated for 2 hours. The solution was filtered with cotton to remove the resin and the remaining solution was evaporated under a stream of nitrogen. The residues were purified with liquid extraction with diethyl ether, dried with nitrogen, and lyophilized overnight. The first coupling step was for a FMOC-cysteine (Trt), the second for FMOC-Lys(Me)<sub>3</sub>-OH chloride, and the last for the photoaffinity group with a carboxylic acid. The diazirine group used was 4-[3-(trifluoromethyl)-3H-diaziren-3-yl]benzoic acid (TDBA), the benzophenone group used was (RS)-2-(3-benzoylphenyl)-propionic acid, and the aryl azide group used was 4-azidobenzoic acid. <sup>1</sup>H and <sup>13</sup>C NMR spectra were recorded on a Bruker Avance III 500 MHz spectrometer.

**Preparation of Array Plates.** Stainless steel plates (18 X 18 mm) were washed in hexanes, ethanol, DI water, ethanol again, and then dried under nitrogen. The plates were modified by evaporation of 5 nm of titanium at a rate of 0.02 nm sec<sup>-1</sup> (Electron Beam, Thermionics Laboratory Inc. Hayward, CA) at a pressure of 1–5 x 10<sup>-6</sup> mTorr through an aluminum mask with holes in the geometry of a standard 384-well array with 2.8 mm circles. A layer of 35 nm of gold was then deposited at 0.05 nm sec<sup>-1</sup>. The plates were stored under vacuum until use.

**Monolayer formation.** The gold-coated plates were immersed in an ethanolic solution of two alkyl-disulfides (0.2 mM) where one end was functionalized with a maleimide group and the other with a tri(ethylene glycol) group in a 1:4 ratio for 16 hours at room temperature. The chips were then washed with ethanol, DI water, ethanol again, and then dried under a stream of nitrogen. A solution of the photoaffinity linker (100 μM in 100 mM tris buffer, pH 7.5) was applied to the plates for 30 min at 37°C to immobilize the 3-trifluoromethyl-3-phenyl-diazirine (TPD) group to the monolayer array.

**Photoimmobilization of Molecules.** Small volumes of solutions of molecules or reaction mixtures (1  $\mu\text{L}$ ) were transferred onto the plates having an array of monolayers presenting the TPD group. The solutions were dried over air or in a vacuum desiccator. The plates were placed under a UV lamp sealed with nitrogen gas for 10 min at  $1 \text{ J}/\text{cm}^2$ . The UV lamp used was the UVP Cross-linker 1000L with 365 nm tubes. After irradiation, the plates were rinsed with ethanol, DI water, and ethanol again. Then the MALDI-matrix, 10 mg/mL solution of 2,4,6-trihydroxyacetophenone in acetone, was applied to the monolayer for analysis with the AB Sciex 5800 MALDI-TOF/TOF mass spectrometer in the reflector positive mode.

**Enzyme Reactions.** Reactions of CYP2C9-mediated oxidation of tolbutamide were performed in 15- $\mu\text{L}$  reaction mixtures containing tolbutamide (25–1250  $\mu\text{M}$ ), 100 mM tris buffer, pH 7.5, P450 CYP2C9\*1 (0.4  $\mu\text{M}$ ) and the NADPH-regenerating system (1.3 mM NADP<sup>+</sup>, 3.3 mM glucose-6-phosphate, 3.3 mM magnesium chloride, and 0.4 U/mL glucose-6-phosphate dehydrogenase). Mixtures were preincubated at 37 °C for 5 min and the reactions were initiated by the addition of an NADPH-regenerating system and incubated at 37 °C. Reactions were terminated at various time points (0, 30, 60 min) by the addition of HCl (3M, 5  $\mu\text{L}$ ). Proteins were removed by pelleting with high-speed centrifugation at 10,000 g for 5 min. The supernatants were extracted for tolbutamide and hydroxy-tolbutamide with diethyl ether. The extracted organic layer was reduced to a residue that was reconstituted in acetonitrile: water for analysis with TI-SAMDI.

**Chemical Reactions.** The Suzuki-Miyaura coupling reaction was performed by combining 2-bromobenzonitrile (125 mM, final concentration), potassium (4-methyl-phenyl)trifluoroborate (150 mM), and K<sub>2</sub>CO<sub>3</sub> (125 mM) in 4 mL of ethanol:water (1:1, v/v). The catalyst, Pd(OAc)<sub>2</sub> (1 mol %), was added to initiate the reaction. During the course of the reaction, samples (100  $\mu\text{L}$ ) were removed at various time points and quenched with addition of formic acid (10  $\mu\text{L}$ ). The catalyst was removed by filtration with cotton and diatomite, and the reaction mixtures were stored at -20°C until analysis. A standard molecule, 4'-methyl-2-biphenylcarboxylic acid (125 mM), having a similar structure to the product was added in equal volumes to the quenched sample. The sample was then ready for TI-SAMDI analysis.

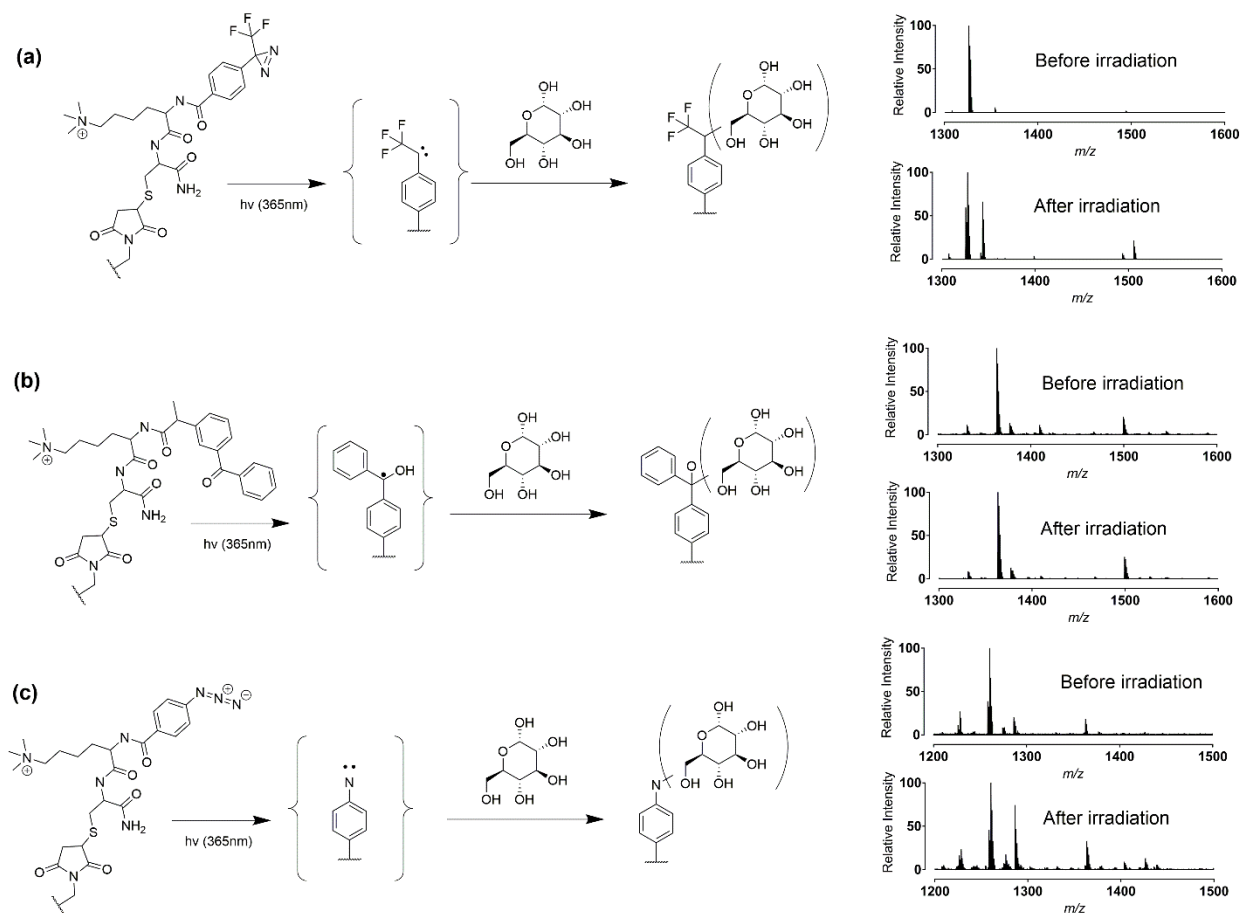

Figure S.1. Comparison of three photoimmobilization strategies for glucose. Spectra are shown for monolayers presenting each of the three photoaffinity groups; (a) diazirine; (b) benzophenone; (c) aryl azide, before and after irradiation to immobilize glucose. (a) The diazirine-terminated alkanethiolate appears at  $m/z$  1325 (after loss of nitrogen and conversion to carbene during the MALDI experiment) and showed the expected peak after immobilization of glucose ( $m/z$  1505) The byproducts are due to reaction with water ( $m/z$  1341) and 2,4,6-trihydroxyacetophenone ( $m/z$  1493), the MALDI matrix. (b) The benzophenone group ( $m/z$  1363) showed no reaction with glucose after irradiation, (c) and the aryl azide group ( $m/z$  1261) showed inefficient immobilization of glucose with many byproducts.

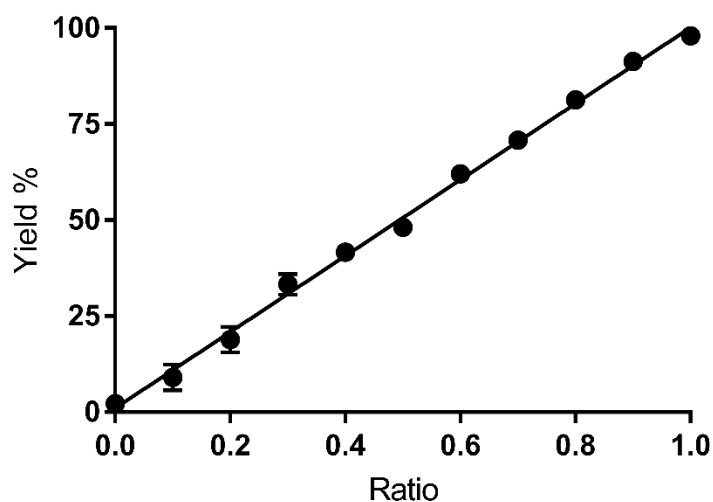

Figure S.2. A calibration curve for tolbutamide and hydroxy-tolbutamide. A series of solutions having a range of hydroxy-tolbutamide to tolbutamide ratios, at a constant total concentration (1mM) were prepared, photoimmobilized as described in the earlier, and analyzed by SAMDI MS. The measured fractions of hydroxy-tolbutamide (determined from the peak intensity for hydroxy-tolbutamide divided by the sum of the intensities for hydroxy-tolbutamide and tolbutamide) were linearly related to the actual fractions, demonstrating that these molecules had similar immobilization and ionization efficiencies.

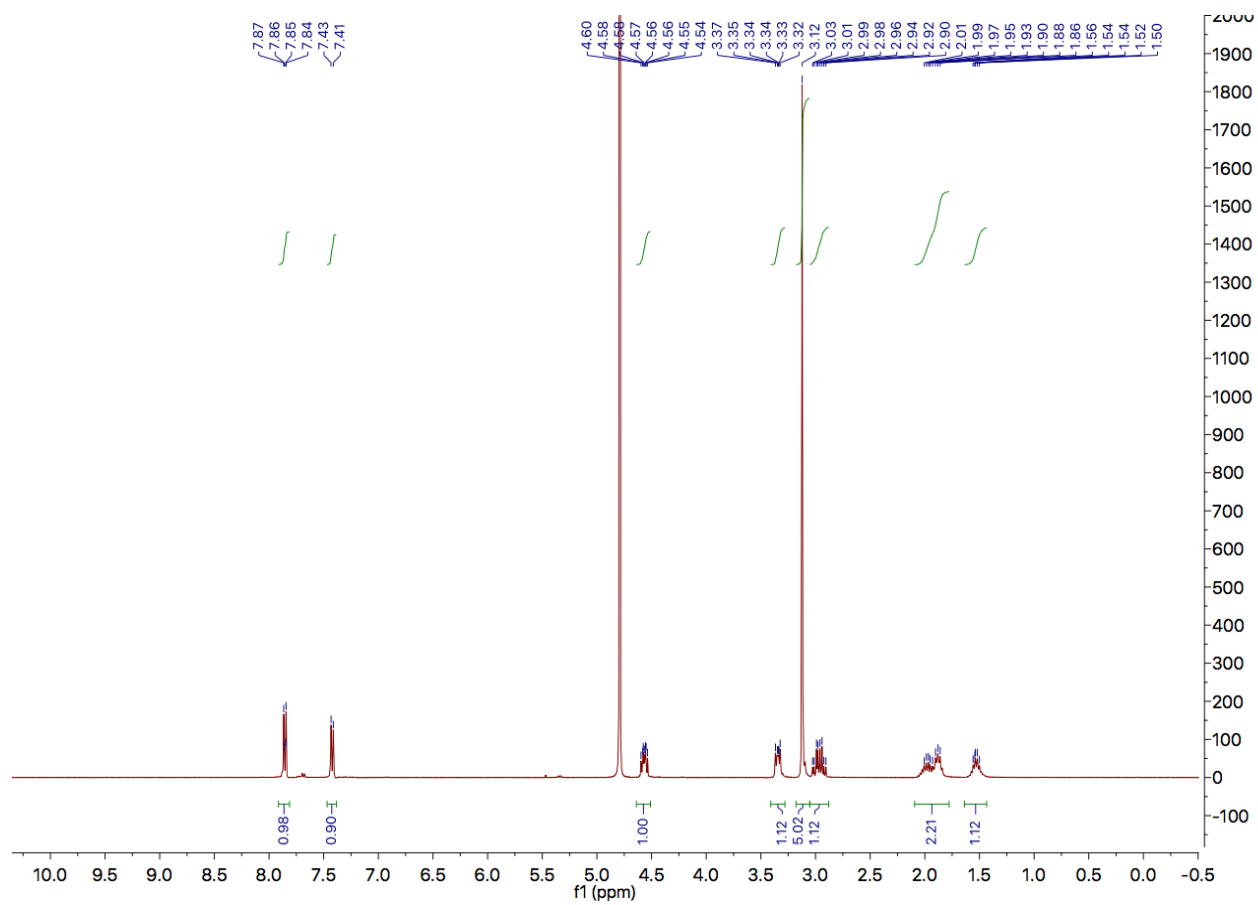

Figure S.3.  $^1\text{H}$ -NMR spectrum of photoaffinity linker.

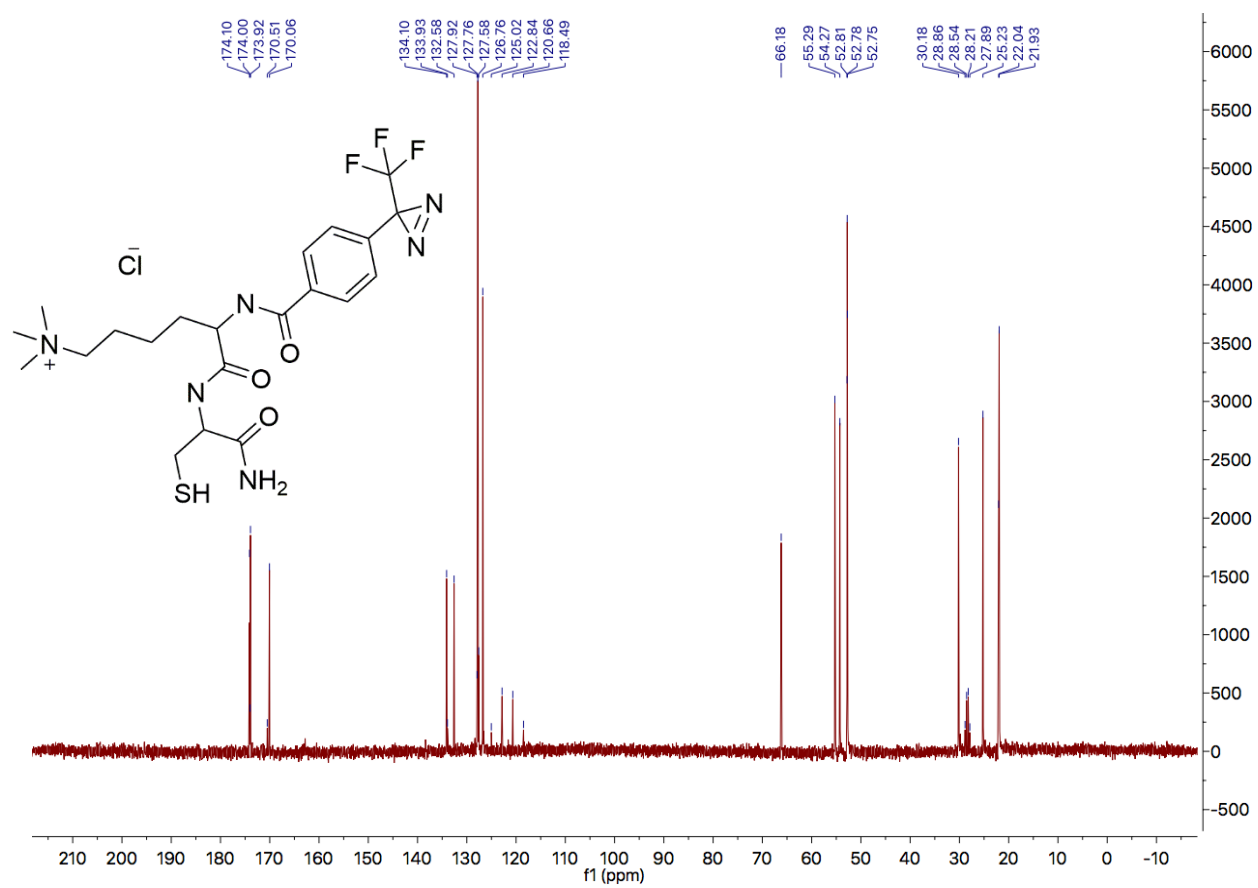

Figure S.4.  $^{13}\text{C}$ -NMR spectrum of photoaffinity linker.
